# Supplementary material for: The effects of pastoral intensification on the feeding interactions of generalist predators in streams
Source: PubMed Central journal article supplement (PMC5887918; doi:10.1111/mec.14459), 2017-12-23

# The effects of pastoral intensification on the feeding interactions of generalist predators in streams

C.E. Pearson, W.O.C. Symondson, E.L. Clare, S.J. Ormerod, E. Iparraguirre Bolaños, and I.P. Vaughan

## ***Supplementary Material***

### *Appendix 1 – Deriving the intensity score.*

Forty-five physico-chemical variables were recorded at each site in May 2012 to quantify the intensity of pastoral land use effects on streams (Table S1). Water chemistry was assessed by taking a 150 ml water sample from a riffle in opaque sterilised bottles (SciLabware, HDPE screw cap bottle). The sample was frozen on return to the laboratory and ionic concentrations were determined using ion chromatography for anions (Dionex DX-80 Ion Analyser; Thermo Fisher Scientific, Inc.) and inductively coupled plasma mass spectrometry for cations (Thermo Elemental X-Series ICP-MS; Thermo Fisher Scientific, Inc.). In addition, three measures of pH and conductivity were taken in each site using a handheld probe (HANNA instruments, pH/EC/TDS model HI98129).

Physical habitat was assessed over a 100 m reach (Table S1). Every 10 m the bank material, bank profile, predominant substrate, canopy cover and bank-top vegetation complexity were recorded following River Habitat Survey protocols (Environment Agency, 2003) and the width and depth measured at five equally spaced points across the channel. The total length of bank undergoing active fluvial erosion or livestock poaching was measured over the 100m reach. Flow velocity was measured at three locations in the fastest current and three locations in the margin over the area covered by the kick samples. Areal coverage of fine sediment (< 2 mm) was estimated in 5% increments within ten 0.25 m<sup>2</sup> quadrats which alternated between the channel centre and margin (Zweig and Rabeni, 2001). In addition, the amount of re-suspendable sediment was determined by pushing an open drum (25 cm diameter, 0.0625 m<sup>2</sup>) into the substratum, disturbing the sediment to 2 cm depth for fifteen seconds and capturing a 300 ml sample (Larsen *et al.*, 2009). Three replicate samples were combined to create a 900 ml bulk sample from which sediment between 0.025 and 1 mm was filtered. Ash

free dry mass was then determined to distinguish organic and inorganic components (Riley *et al.*, 2003).

Table S1 – Description of physical habitat characteristics surveyed in 2012 and 2013.

| Environmental variables   | Units                                  | Description                                                                                                                                                                                                                  |
|---------------------------|----------------------------------------|------------------------------------------------------------------------------------------------------------------------------------------------------------------------------------------------------------------------------|
| Depth                     | Metres (m)                             | Five measures across each of ten transects                                                                                                                                                                                   |
| Wetted width              | Metres (m)                             | Measured at ten transects                                                                                                                                                                                                    |
| Bank material             | RHS categories                         | Every 10m: Boulder, Cobble, Gravel or Earth                                                                                                                                                                                  |
| Substrate                 | RHS categories                         | Every 10m: Bedrock, Boulder, Cobble, Pebble, Sand or Silt                                                                                                                                                                    |
| Bank top vegetation       | RHS categories                         | Every 10m: Complex, Simple, Uniform or Bare                                                                                                                                                                                  |
| Canopy cover              | Absent, <33 %, >33 %, >66 %            | Three transects within kick sample area                                                                                                                                                                                      |
| Bank profile              | RHS categories                         | Every 10m: Vertical, Composite, Steep, Gentle                                                                                                                                                                                |
| Conductivity              | Parts per million (ppm)                | Three replicates in kick sample area                                                                                                                                                                                         |
| Extent of fluvial erosion | Metres (m)                             | Length of bank undercut                                                                                                                                                                                                      |
| Extent of bank poaching   | Metres (m)                             | Length of bank slumping from livestock trampling                                                                                                                                                                             |
| Flow velocity             | Metres per second ( $\text{ms}^{-1}$ ) | Three replicates in mid-channel and three in margin                                                                                                                                                                          |
| pH                        | None                                   | Three replicates in kick sample area                                                                                                                                                                                         |
| Resuspendable sediment    | Grams per litre                        | Weight of resuspendable inorganics (25 $\mu\text{m}$ to 1 mm) (May 2012 only)                                                                                                                                                |
| Fine sediment cover       | Percent (%)                            | Average fine sediment cover from 10 quadrats in mid-channel and margin                                                                                                                                                       |
| Water chemistry           | $\text{mg L}^{-1}$                     | Flouride, Chloride, Nitrite, Bromide, Nitrate, Phosphate, Sulphate, Sodium, Magnesium, Aluminium, Potassium, Calcium, Vanadium, Chromium, Manganese, Iron, Copper, Nickle, Cobalt, Zinc, Arsenic, Cadmium, Lead and Selenium |

A principal component analysis (PCA) was performed on the 45 physico-chemical variables to create the intensity score. The first principal component (PC1) explained 29.7 % of total variance and was highly correlated with percentage of the catchment under improved pasture (Pearson's  $r = 0.82$ ). The variables with the strongest loadings on this axis were consistent with the expected effects of intensification (*e.g.* nitrate concentration, extent of bank poaching, fine sediment cover; Table S2). All other components explained < 10% of the variation and

were not related to agricultural intensity. PC1 scores were therefore interpreted as measure of pastoral intensification ('intensity score').

*Table S2: Loading coefficients for Axis 1 of Principal Components Analysis of physico-chemical variables.*

| <b>Variable</b>                 | <b>Axis 1</b> |
|---------------------------------|---------------|
| Calcium                         | 0.25          |
| Conductivity                    | 0.24          |
| Vanadium                        | 0.24          |
| Sulphate                        | 0.24          |
| Potassium                       | 0.23          |
| Sodium                          | 0.23          |
| Chloride                        | 0.22          |
| Magnesium                       | 0.22          |
| Nitrate                         | 0.22          |
| Chromium                        | 0.21          |
| Canopy cover                    | 0.21          |
| Length of bank poaching         | 0.20          |
| Inorganic sediment              | 0.18          |
| Organic sediment                | 0.18          |
| Fine sediment cover             | 0.17          |
| Bed sediment calibre            | 0.17          |
| Extent of all erosion           | 0.17          |
| Bank material calibre           | 0.15          |
| pH                              | 0.15          |
| Gentle banks                    | 0.14          |
| Selenium                        | 0.14          |
| Artificial substrate            | 0.14          |
| Iron                            | 0.09          |
| Nickel                          | 0.09          |
| Average width                   | 0.05          |
| Average mid-stream flow veloc   | 0.03          |
| Cobalt                          | 0.01          |
| Vertical banks                  | 0.01          |
| Fluoride                        | -0.01         |
| Average flow velocity at margin | -0.02         |
| Bromide                         | -0.02         |
| Phosphorus                      | -0.03         |
| Steep banks                     | -0.03         |
| Manganese                       | -0.04         |
| Bedrock substrate               | -0.04         |
| Zinc                            | -0.05         |
| Arsenic                         | -0.05         |
| Undercut banks                  | -0.06         |
| Bank vegetation score           | -0.07         |

|                 |       |
|-----------------|-------|
| Composite banks | -0.09 |
| Aluminium       | -0.09 |
| Copper          | -0.10 |
| Average depth   | -0.12 |
| Lead            | -0.15 |
| Cadmium         | -0.15 |

Appendix 2 – Genera used to test generality of LCO-1490 and HCO-1777 primer pair for potential prey species.

| Group represented | Family/ Genera tested                 |
|-------------------|---------------------------------------|
| Target Predators  | <i>Dinocras</i><br><i>Rhyacophila</i> |
| Trichoptera       | <i>Hydropysche</i>                    |
| Plecoptera        | <i>Isoperla</i>                       |
| Ephemoptera       | <i>Baetis</i>                         |
| Gastropods        | <i>Ancylus</i><br>Physidae            |
| Bivalvia          | <i>Pisidium</i>                       |
| Amphipods         | <i>Asellus</i>                        |
| Isopods           | <i>Gammarus</i>                       |
| Diptera           | Chironomidae                          |
| Tricladia         | Planaria                              |
| Elmidae           | <i>Limnius</i>                        |
| Hirudinaeta       | <i>Eropobdella</i>                    |
| Lumbricidae       | Oligochaetes                          |
| Scritidae         | Aquatic beetles                       |

Appendix 3 – Number of individual predator gut contents successfully sequenced from each survey site with sites labelled 1 to 10 from lowest agricultural intensity to highest agricultural intensity.

| Site  | <i>Dinocras cephalotes</i> |      |     |     | <i>Rhyacophila dorsalis.</i> |      |     |     | Total |
|-------|----------------------------|------|-----|-----|------------------------------|------|-----|-----|-------|
|       | Feb                        | June | Sep | Dec | Feb                          | June | Sep | Dec |       |
| 1     | 8                          | 8    | 8   | 10  | 3                            | 10   | 2   | 6   | 55    |
| 2     | 2                          | 4    | 6   | 5   | 4                            | 2    | 3   | 9   | 35    |
| 3     | 6                          | 8    | 13  | 10  | 3                            | 4    | 0   | 3   | 47    |
| 4     | 9                          | 6    | 7   | 10  | 7                            | 2    | 1   | 8   | 50    |
| 5     | 0                          | 0    | 5   | 8   | 14                           | 4    | 12  | 8   | 51    |
| 6     | 4                          | 6    | 6   | 8   | 6                            | 10   | 0   | 9   | 25    |
| 7     | 0                          | 0    | 0   | 0   | 7                            | 8    | 10  | 1   | 50    |
| 8     | 0                          | 0    | 0   | 0   | 11                           | 9    | 7   | 11  | 38    |
| 9     | 0                          | 0    | 0   | 0   | 6                            | 8    | 2   | 9   | 25    |
| 10    | 0                          | 0    | 0   | 0   | 2                            | 7    | 2   | 7   | 18    |
| Total | 29                         | 32   | 45  | 51  | 63                           | 64   | 39  | 71  | 394   |

Appendix 4 - Selectivity graphs for *Rhyacophila dorsalis* in sites with (n=6) and without (n=4) *Dinocras cephalotes* present.

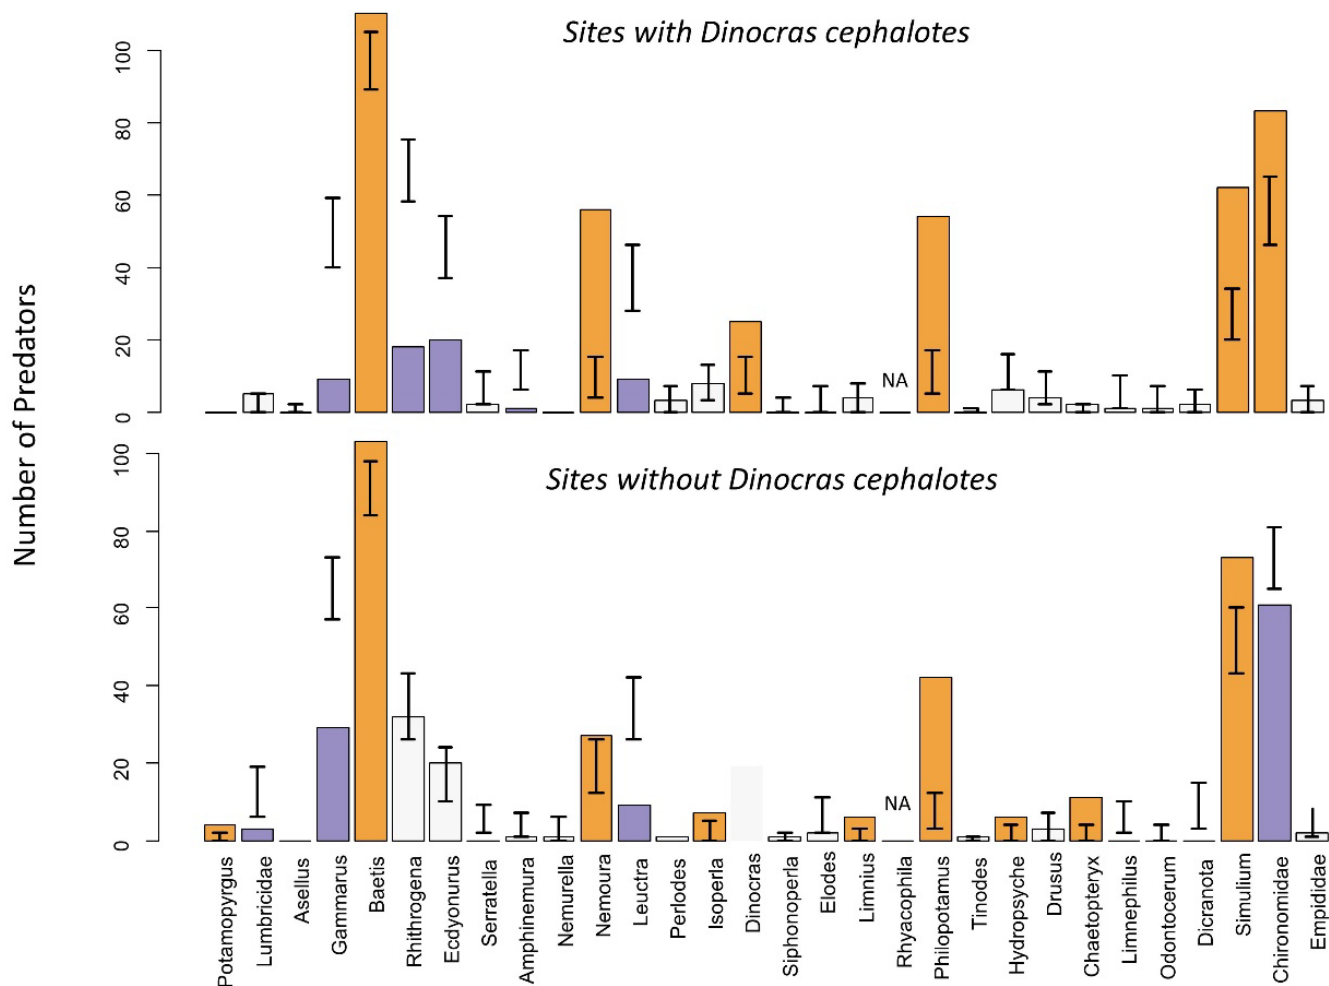

Appendix 5 - Selectivity graphs for *Rhyacophila dorsalis* in the three sites with the highest and lowest agricultural intensity.

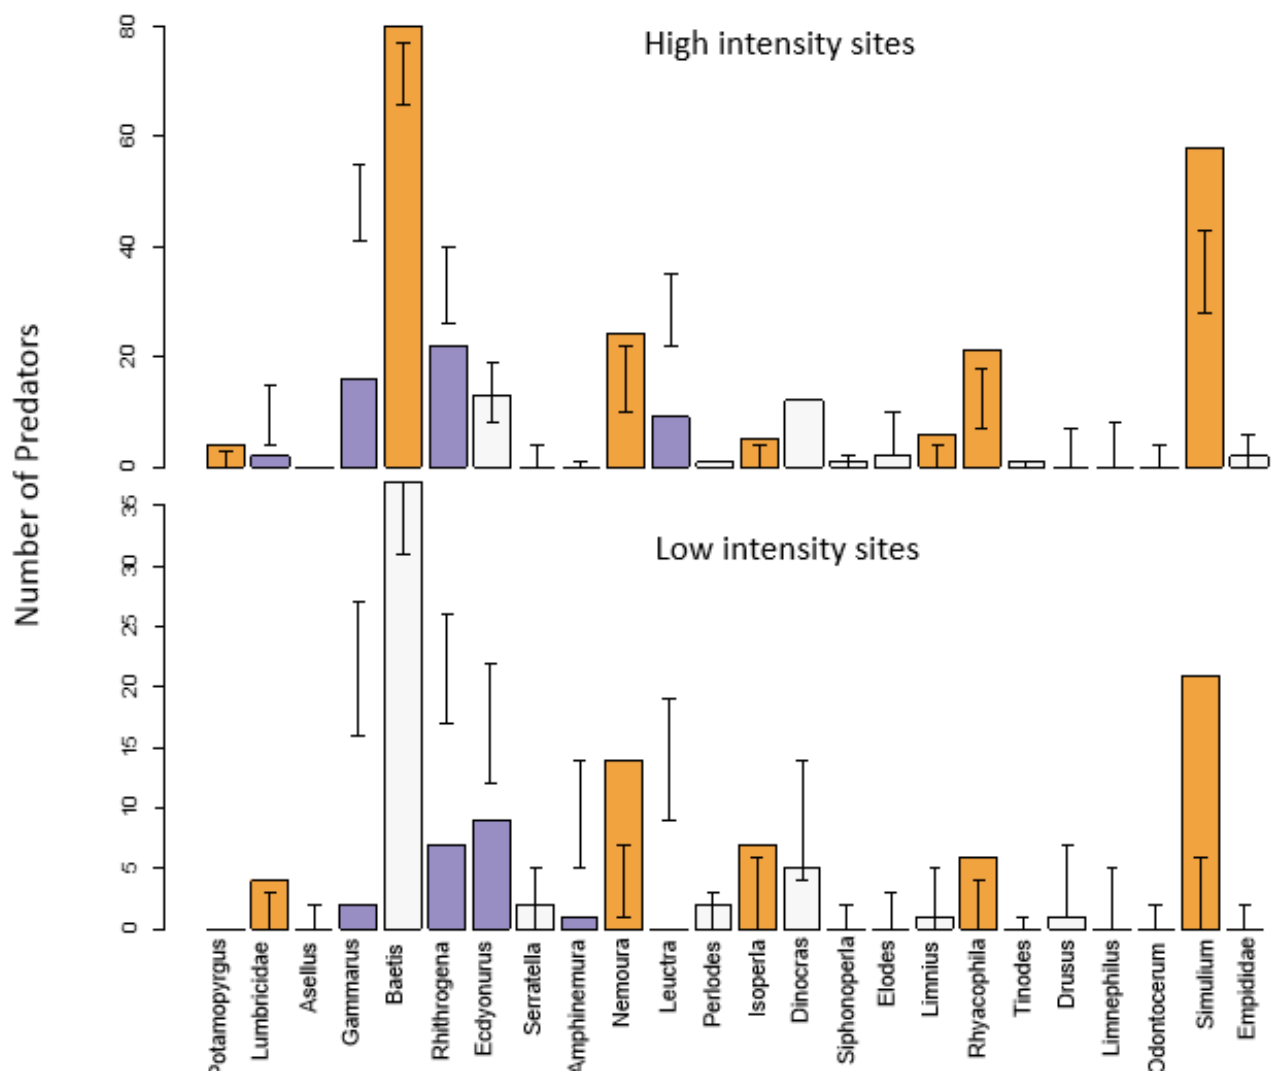

Supplement: MEC-27-590-s001.pdf [file MEC-27-590-s001.pdf]
